# Supplementary material
Source: Elsevier journal article supplement (http://www.radiokron.ru/common/files/manual/MMC1.pdf)
Supplement: MMC1 [file MMC1.pdf]

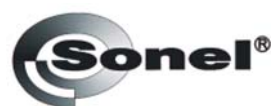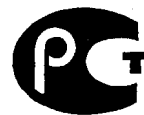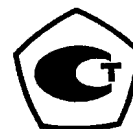

**АЯ 46**

# **МАГАЗИН МЕР СОПРОТИВЛЕНИЙ ПЕТЛИ КОРОТКОГО ЗАМЫКАНИЯ ММС-1**

**РУКОВОДСТВО ПО ЭКСПЛУАТАЦИИ**

Версия 1.02

## СОДЕРЖАНИЕ

|            |                                                                       |           |
|------------|-----------------------------------------------------------------------|-----------|
| <b>1</b>   | <b>ВВЕДЕНИЕ</b> .....                                                 | <b>3</b>  |
| <b>2</b>   | <b>НАЗНАЧЕНИЕ</b> .....                                               | <b>4</b>  |
| <b>3</b>   | <b>ТЕХНИЧЕСКИЕ ДАННЫЕ</b> .....                                       | <b>4</b>  |
| <b>4</b>   | <b>КОМПЛЕКТАЦИЯ</b> .....                                             | <b>5</b>  |
| <b>5</b>   | <b>УСТРОЙСТВО И ПРИНЦИП РАБОТЫ</b> .....                              | <b>5</b>  |
| <b>6</b>   | <b>МАРКИРОВАНИЕ И ПЛОМБИРОВАНИЕ</b> .....                             | <b>7</b>  |
| <b>7</b>   | <b>ОБЩИЕ УКАЗАНИЯ ПО ЭКСПЛУАТАЦИИ</b> .....                           | <b>7</b>  |
| <b>8</b>   | <b>УКАЗАНИЕ МЕР БЕЗОПАСНОСТИ</b> .....                                | <b>7</b>  |
| <b>9</b>   | <b>ПОРЯДОК РАБОТЫ</b> .....                                           | <b>8</b>  |
| <b>9.1</b> | <b>Процедуры регулирования активного сопротивления магазина</b> ..... | <b>8</b>  |
| 9.1.1      | Регулирование первой декады .....                                     | 8         |
| 9.1.2      | Регулирование второй декады .....                                     | 8         |
| 9.1.3      | Регулирование третьей декады .....                                    | 9         |
| 9.1.4      | Регулирование четвертой декады .....                                  | 9         |
| 9.1.5      | Регулирование пятой декады .....                                      | 10        |
| 9.1.6      | Имитация полного сопротивления петли .....                            | 10        |
| <b>10</b>  | <b>ПОВЕРКА МАГАЗИНА</b> .....                                         | <b>10</b> |
| <b>11</b>  | <b>ПРАВИЛА ОБСЛУЖИВАНИЯ И ХРАНЕНИЯ</b> .....                          | <b>11</b> |
| <b>12</b>  | <b>ТРАНСПОРТИРОВАНИЕ</b> .....                                        | <b>11</b> |
| 12.1       | Тара, упаковка .....                                                  | 11        |
| 12.2       | Условия транспортирования .....                                       | 12        |
| <b>13</b>  | <b>ПРИЛОЖЕНИЯ</b> .....                                               | <b>12</b> |
| 13.1       | Сведения об изготовителе и поставщике .....                           | 12        |
| 13.2       | Сведения о сервисном центре .....                                     | 12        |

**Внимание!**

**В связи с постоянной работой по совершенствованию изделия, повышающей его технико-эксплуатационные параметры, в конструкцию могут быть внесены незначительные изменения, не отраженные в настоящем издании.**

**Внимание!**

**Перед началом эксплуатации магазин необходимо выдержать в нормальных климатических условиях не менее 12 часов**

**Внимание!**

**Перед началом эксплуатации магазин необходимо обязательно заземлить, используя разъем  на передней панели прибора. После этого подключить сетевой кабель к соответствующему разъему на задней панели магазина. Работа магазина без заземления категорически запрещена.**

**Внимание!**

**При подаче питания к магазину ММС-1 от электрической сети следует размещать оборудование таким образом, чтобы не было трудностей с его отключением.**

## 1 Введение

Данное Руководство содержит информацию об устройстве и использовании магазина мер сопротивлений петли короткого замыкания ММС-1, эксплуатационных ограничениях, мерах безопасности при работе с ним и предназначено для лиц, работающих с магазином, а также для обслуживающего персонала.

Символы, отображенные на приборе:

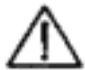

Перед работой с прибором необходимо изучить данное Руководство, тщательно соблюдать правила защиты, а также рекомендации Изготовителя.

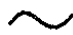

Переменный ток

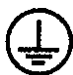

Клемма защитного проводника

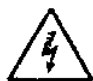

Внимание, опасное напряжение

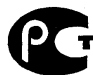

Сертификат соответствия средств измерения, Государственный стандарт РФ.

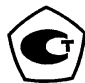

Сертификат утверждения типа в Государственном реестре средств измерений.

## 2 Назначение

Магазин мер сопротивлений петли короткого замыкания ММС-1 предназначен для имитации и задания меры активного сопротивления петли короткого замыкания электросети с напряжением 220/380В(230/400В), 50 Гц переменного тока.

Магазин мер сопротивлений петли короткого замыкания типа ММС-1 применяется как эталонное оборудование для поверки (калибровки) и сертификационных испытаний измерителей серии МЗС, МІЕ, МРР, МРІ и других по параметрам короткого замыкания петли «фаза-нуль», «фаза-земля», «фаза-защитный проводник» и «фаза-фаза» с кратковременным (до 30-40 мс) измерительным током до 45 А.

Магазин мер сопротивлений петли короткого замыкания типа ММС-1 (далее по тексту: магазин) обеспечивает ступенчатое регулирование активного сопротивления в диапазоне от 0,1Ω до 4111Ω с пределами допускаемой основной погрешности ± 0,1% на первой декаде и ± 0,05% на остальных декадах.

Сопротивления магазина характеризуются высокой допустимой мощностью рассеивания, что обеспечивает возможность их использования в измерительных цепях.

Сопротивления магазина соответствуют всем требованиям, которые предъявляются лабораториями поверки и испытаний средств измерений к магазинам сопротивлений и могут быть использованы и в других измерительных схемах постоянного и переменного тока.

## 3 Технические данные

Номинальные значения активного сопротивления:

|                             |                                              |
|-----------------------------|----------------------------------------------|
| декада I                    | 0,1/0,2/0,3/0,4/0,5/0,6/0,7/0,8/0,9/1,0 Ом   |
| декада I + II               | 2/3/4/5/6/7/8/9/10/11 Ом                     |
| декада I + II + III         | 21/31/41/51/61/71/81/91/101/111 Ом           |
| декада I + II + III +IV     | 211/311/411/511/611/711/811/911/1011/1111 Ом |
| декада I + II + III +IV + V | 2111/3111/4111 Ом                            |

Допускается кратковременное использование других номинальных значений активного сопротивления согласно методикам поверки приборов.

Максимальный импульсный ток, А:

| Декады             | Максим. имп.ток, А<br>( $T_{изм} \leq 30-40$ мс) |
|--------------------|--------------------------------------------------|
| декада 10 x 0,1 Ом | 45                                               |
| декада 10 x 1 Ом   | 35                                               |
| декада 10 x 10 Ом  | 15                                               |
| декада 10 x 100 Ом | 2                                                |
| декада 3 x 1000 Ом | 0,3                                              |

Предел основной погрешности, Ом:

| Декады             | Предел основной допускаемой погрешности |
|--------------------|-----------------------------------------|
| декада 10 x 0,1 Ом | ± 0,1%·R                                |
| декада 10 x 1 Ом   | ± 0,05%·R                               |
| декада 10 x 10 Ом  | ± 0,05%·R                               |
| декада 10 x 100 Ом | ± 0,05%·R                               |
| декада 3 x 1000 Ом | ± 0,05%·R                               |

Класс точности магазина:

| Диапазон сопротивлений, Ом | Класс точности |
|----------------------------|----------------|
| 0,1 ÷ 1                    | 0,1            |
| 1 ÷ 10                     | 0,05           |

|             |      |
|-------------|------|
| 20 ÷ 110    | 0,05 |
| 200 ÷ 1100  | 0,05 |
| 2000 ÷ 4000 | 0,05 |

Начальное сопротивление магазина (сопротивление при установке всех декад переключателей на нулевые показания) не превышает 0,025 Ом.

Магазин предназначен для работы при температуре окружающей среды от 10 до 30 °С, относительной влажности от 25 до 80% и атмосферном давлении от 630 до 800 мм рт.ст. Условия хранения магазина указаны в п.11 настоящего руководства.

Дополнительные технические характеристики:

- Нормальные значения температуры (20 ± 5) °С
- Рабочая область температуры (20 ± 10) °С
- Предел допускаемого значения дополнительной погрешности, вызванной изменением температуры окружающей среды от нормальной, в пределах рабочей области температур, равен классу точности.
- Максимальное рабочее напряжение: 450 В
- Время цикла измерений  $T_{изм}$ : ≤ 30-40 мс
- Время остывания (паузы)  $T_{пауз}$ :  
при  $U_{изм}$  до 230В ≥ 20с  
при  $U_{изм}$  до 450В ≥ 25с
- Сопротивление изоляции: > 100 МОм
- Габаритные размеры: 500 x 350 x 170 мм
- Масса: не более 10 кг

## 4 Комплектация

Магазин ММС-1 поставляется в следующей комплектности:

- Магазин ММС-1 – 1 шт.
- Магазин ММС-1.Руководство по эксплуатации – 1 шт.
- Магазин ММС-1.Паспорт – 1 шт.
- Методика поверки МП-060/447-2008 – 1 шт.
- Кабель питания с сетевой вилкой – 1 шт.

## 5 Устройство и принцип работы

Лицевая панель магазина с функциональными переключателями изображена на рис.1, схема соединений декад магазина показана на рис.2, а схема подключений магазина при имитации активного сопротивления петли короткого замыкания – на рис.3.

Магазин сопротивлений типа ММС-1 состоит из пяти декад, соединенных последовательно. На первой позиции находится декада с самым маленьким значением активного сопротивления ступени (x 0,1 Ом), а на последней – декада с самым большим значением активного сопротивления ступени (x 1000 Ом). Регулирование настройки сопротивления начинается с самой нижней декады, а заканчивается – на наивысшей декаде, при этом обязательно должен соблюдаться тот принцип, что все декады, установленные ниже, находятся на максимальных значениях.

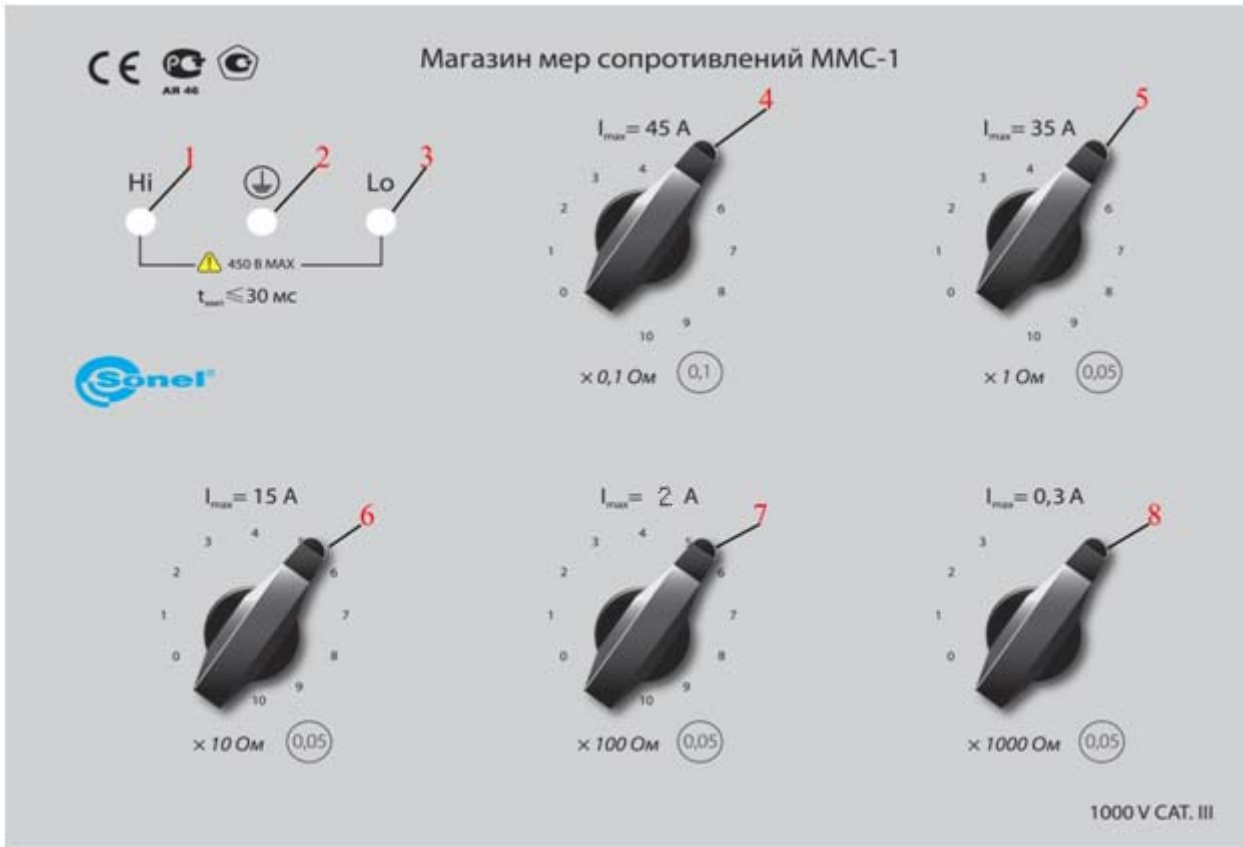

Рис.1. Лицевая панель магазина MMC-1:

- 1 – входной разъем подключения внешнего напряжения фазы (H);
- 2 – разъем защитного заземления (PE);
- 3 – выходной разъем подключения поверяемого средства измерений (L);
- 4 – поворотный переключатель (множитель) первой декады;
- 5 – поворотный переключатель (множитель) второй декады;
- 6 – поворотный переключатель (множитель) третьей декады;
- 7 – поворотный переключатель (множитель) четвертой декады;
- 8 – поворотный переключатель (множитель) пятой декады.

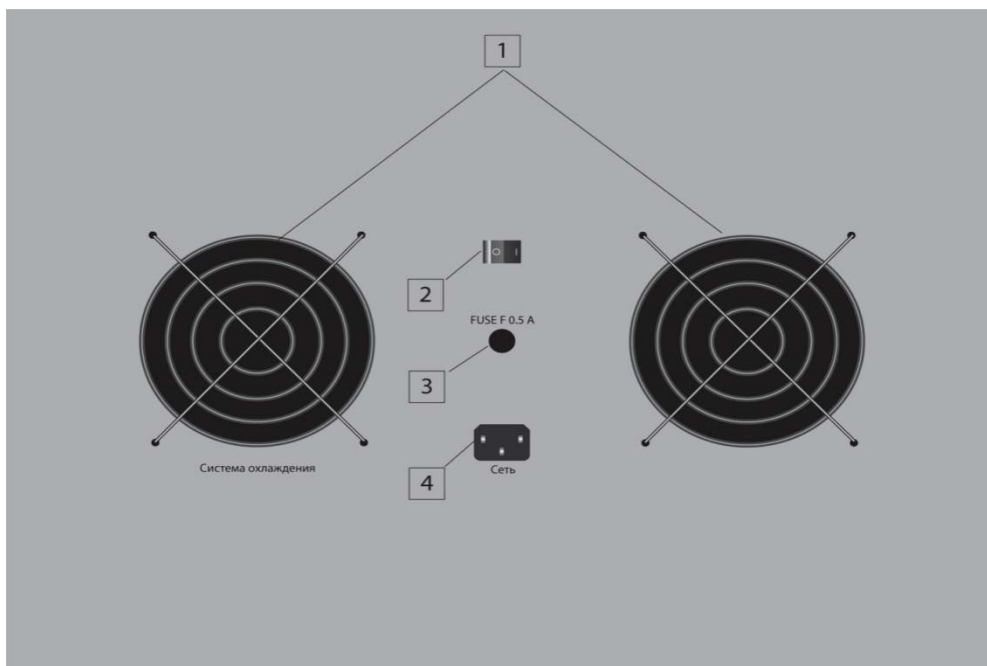

Рис.1.1 Боковая панель магазина MMC-1

- 1 – воздухоотводы;

- 2 – выключатель системы охлаждения;
- 3 – плавкий предохранитель (F 0,5 А);
- 4 – разъем для подключения сетевого кабеля.

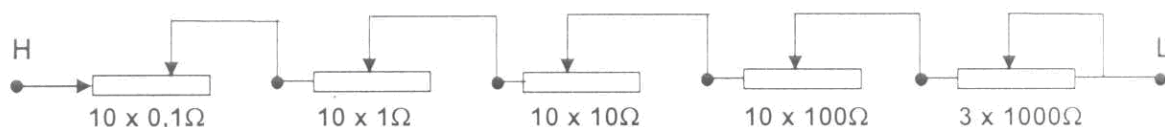

Рис.2. Схема соединения декад магазина.

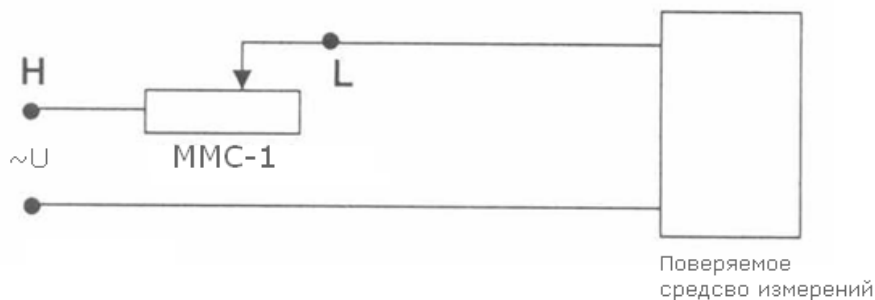

Рис.3. Измерительная система для поверки измерителей параметров цепей короткого замыкания.

## 6 Маркирование и пломбирование

Наименование и условное обозначение магазина, товарный знак предприятия нанесены в верхней части лицевой панели.

Заводской порядковый номер магазина и год изготовления расположены на задней панели.

Магазин, принятый ОТК, пломбируется самоклеющимися саморазрушающимися при вскрытии корпуса пломбами, которые расположены на защелках на верхней панели.

## 7 Общие указания по эксплуатации

Техническое обслуживание магазина проводится с целью обеспечения его постоянной исправности и готовности к использованию.

В процессе технического обслуживания необходимо проверить:

- сохранность пломб;
- комплектность магазина;
- отсутствие внешних механических повреждений;
- чистоту разъемов и гнезд;
- состояние лакокрасочных покрытий, гальванических покрытий и четкость гравировки;
- состояние соединительных кабелей и переходов.

При работе магазина категорически запрещается ставить его на переднюю и заднюю панели, что может привести к поломке органов управления и ввода сетевого шнура.

## 8 Указание мер безопасности

К работе с магазином допускаются лица, прошедшие инструктаж по технике безопасности при работе с электроприборами.

Перед включением магазина в сеть необходимо проверить исправность сетевого шнура питания.

Перед началом измерений нужно проверить, подключены ли провода к соответствующим измерительным гнездам;

Ремонт магазина должен осуществляться только представителями авторизованного Сервисного центра.

**Внимание!**

**Запрещается использование магазина без включенной системы охлаждения и/или с затрудненным путем воздухоотвода.**

## 9 Порядок работы

Например, нам нужно установить значение активного сопротивления, которое равно 2 Ом. Для этого декаду, обозначенную как 10 x 0,1 установить на позицию «10» (1 Ом), а декаду, обозначенную 10 x 1 Ом, установить в позицию «1» (1 Ом), тогда получим требуемое значение 2 Ом. Используя вышеуказанный способ регулирования, в этом случае в цепь будут включены 11 сопротивлений, и на каждом из них откладывается пропорциональная часть мощности, затрачиваемой в цепи.

Недопустима установка второй декады в позицию «2» (2 Ом), когда декада 10 x 0,1 Ом установлена в позиции «0» и мощность, затрачиваемая на сопротивлении 2 Ом, во второй декаде будет на 100% больше допустимой мощности рассеивания.

Алгоритм правильной установки сопротивлений по декадам указан в п.9.1

**Внимание!**

**Несоблюдение вышеуказанной процедуры настройки магазина сопротивлений может привести к его чрезмерному перегреву и выходу из строя.**

### 9.1 Процедуры регулирования активного сопротивления магазина

#### 9.1.1 Регулирование первой декады

На первой декаде (обозначенной 10 x 0,1 Ом) можно установить каждое значение активного сопротивления в диапазоне 0,1 Ом...1,0 Ом (более высокие декады должны быть установлены в позиции „0“, рис.4).

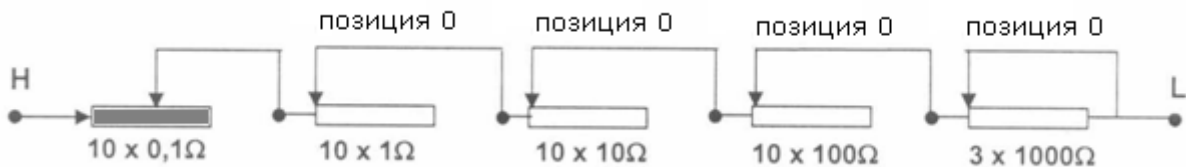

Рис.4 Система соединений при регулировании активного сопротивления первой декадой.

#### 9.1.2 Регулирование второй декады

С целью перехода к регулированию активного сопротивления второй декадой, первая декада должна оставаться в позиции „10“ (т.е. на значении, равном 1 Ом, рис.5),

На второй декаде (обозначенной как 10 x 1 Ом) можно установить каждое значение активного сопротивления в диапазоне 1 Ом...11 Ом (более высокие декады должны быть установлены в позиции „0“), т.о. получают суммарное значение активного сопротивления в диапазоне:  $R_{min} < R < R_{max}$ .

$$R_{min} = 1 \text{ Ом} + 1 \text{ Ом} = 2 \text{ Ом}$$

$$R_{max} = 1 \text{ Ом} + 10 \text{ Ом} = 11 \text{ Ом}$$

**Внимание: не рекомендуются все другие настройки, напр., 3,2 Ом; 5,7 Ом и т.д.**

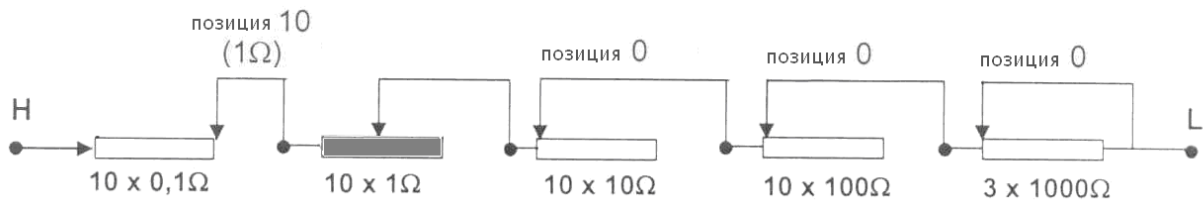

Рис.5. Система соединений при регулировании активного сопротивления второй декадой.

### 9.1.3 Регулирование третьей декады

С целью перехода к регулированию активного сопротивления третьей декадой, первая декада должна оставаться установленной в позицию „10“ (т.е. на значение 10Ом), а вторую декаду необходимо установить в позицию 9 (т.е. на значение 9 Ом), рис.6.

На третьей декаде (обозначенной как 10 x 100Ом) можно настроить каждое значение активного сопротивления в диапазоне 100Ом...1100Ом (более высокие декады должны быть установлены в позиции „0“), т.о. получают суммарное значение активного сопротивления в диапазоне:

$$\text{от } R_{\min} = 10\text{Ом} + 100\text{Ом} + 10\text{Ом} = 210\text{Ом}$$

$$\text{до } R_{\max} = 10\text{Ом} + 100\text{Ом} + 1000\text{Ом} = 1110\text{Ом}$$

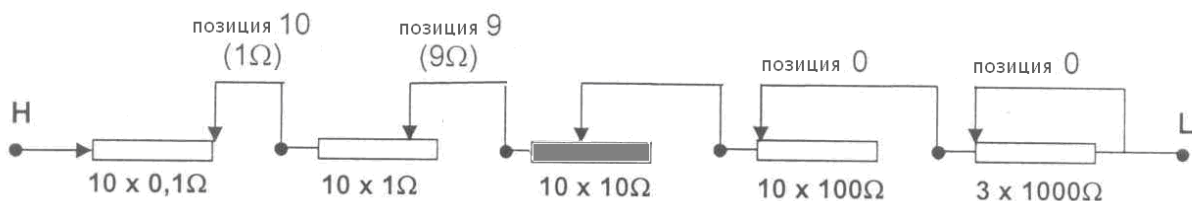

Рис.6. Система соединений при регулировании активного сопротивления третьей декадой.

**Внимание: не рекомендуются все другие настройки, кроме вышеуказанных.**

### 9.1.4 Регулирование четвертой декады

С целью перехода к регулированию активного сопротивления четвертой декадой, первая декада должна оставаться установленной в позицию „10“ (т.е. на значениях 10Ом), а вторую декаду необходимо установить в позицию „9“ (т.е. на значение 90 Ом), рис.7.

На четвертой декаде (обозначенной как 10 x 100Ом) можно настроить каждое значение активного сопротивления в диапазоне 1000Ом...1100 Ом (более высокие декады должны быть установлены в позиции „0“), т.о. получают суммарное значение активного сопротивления в диапазоне:

$$\text{от } R_{\min} = 10\text{Ом} + 10\text{Ом} + 100\text{Ом} + 100\text{Ом} = 211\text{Ом}$$

$$\text{до } R_{\max} = 10\text{Ом} + 10\text{Ом} + 100\text{Ом} + 1000\text{Ом} = 1111\text{Ом}$$

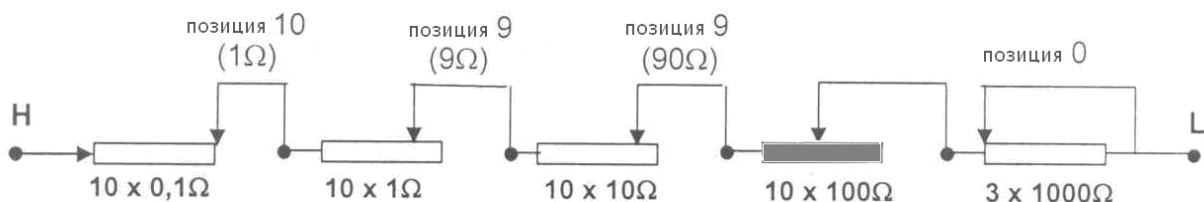

Рис.7. Система соединений при регулировании активного сопротивления четвертой декадой.

**Внимание: не рекомендуются все иные настройки.**

### 9.1.5 Регулирование пятой декады

С целью перехода к регулированию активного сопротивления пятой декадой, первая декада должна оставаться установленной в позицию „10“ (т.е. на значении 1Ом), вторую декаду необходимо установить в позицию „9“ (т.е. на значении 9Ом), третья декада должна быть установлена в позиции „9“ (или же на значении 90Ом), четвертую декаду необходимо установить в позицию „9“ (или же на значение 900Ом, рис.8),

На пятой декаде (обозначенной как 3 x 1000Ом) можно настроить каждое значение активного сопротивления в диапазоне 1000Ом...4000 Ом, т.о. получают суммарное значение активного сопротивления в диапазоне:

$$\text{от } R_{\min} = 1\text{Ом} + 10 \text{ Ом} + 100 \text{ Ом} + 1000 \text{ Ом} + 1000 \text{ Ом} = 2111 \text{ Ом}$$

$$\text{до } R_{\max} = 1\text{Ом} + 10 \text{ Ом} + 100 \text{ Ом} + 1000 \text{ Ом} + 3000 \text{ Ом} = 4111 \text{ Ом}$$

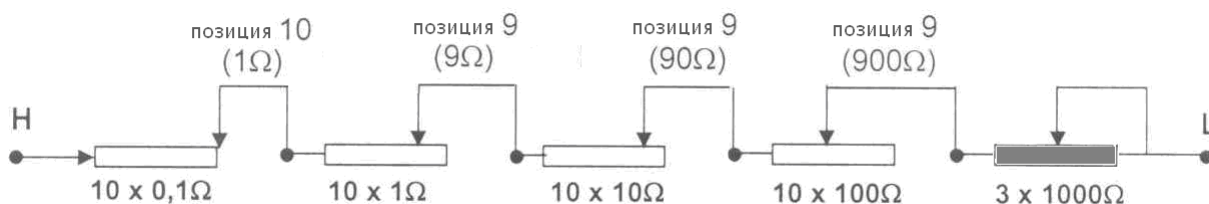

Рис.8. Система соединений при регулировании активного сопротивления пятой декадой.

Измерители параметров петли короткого замыкания можно также поверять начиная с наибольшего значения активного сопротивления петли. С этой целью декады магазина необходимо настроить в соответствии с рис.8. Затем регулирование осуществляется начиная с пятой декады, после чего поочередно уменьшаются значения четвертой, третьей, второй и первой декады.

Описанный способ настройки магазина обеспечивает включение в ряд всех используемых сопротивлений, благодаря чему многократно уменьшается рассеиваемая на них мощность.

### 9.1.6 Имитация полного сопротивления петли

В случае необходимости имитации полного сопротивления петли короткого замыкания последовательно с магазином необходимо включить внешнюю эталонную катушку. Схема соединений измерительной системы показана на рис.9.

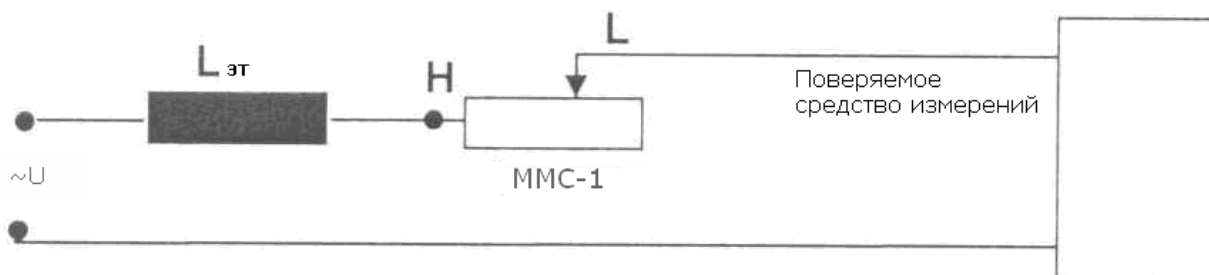

Рис.9. Измерительная система для моделирования полного сопротивления петли короткого замыкания.

## 10 Поверка магазина

Поверка магазина ММС-1 должна проводиться Органами Метрологической Службы, аккредитованными в Федеральном Агентстве по техническому регулированию и метрологии на право поверки, в соответствии с документом «МП-060/447-2008» методика поверки.

Межповерочный интервал – 1 год.

## 11 Правила обслуживания и хранения

Оператор, проводящий измерения на магазине ММС-1, может проводить следующие работы по сервисному обслуживанию магазина:

- замена предохранителя;
- чистка магазина.

Параметры внутреннего плавкого предохранителя – F 0,5А.

### **Внимание!**

**Перед заменой плавкого предохранителя, обязательно осуществить отключение магазина от сети питания.**

Корпус магазина ММС-1 можно чистить мягкой сухой тканью. Запрещается использовать растворители и абразивные чистящие средства (порошки, пасты и так далее). Электронная схема ММС-1 не нуждается в чистке, за исключением гнезд подключения измерительных проводников.

Все остальные работы по сервисному обслуживанию проводятся только в авторизованном сервисном центре ООО «СОНЭЛ».

Питание системы охлаждения магазина осуществляется от сети переменного тока 220В, 50 Гц.

ММС-1, упакованный в потребительскую и транспортную тару в соответствии со сборочными чертежами, может транспортироваться любым видом транспорта на любые расстояния.

ММС-1, упакованный в потребительскую и транспортную тару в соответствии со сборочными чертежами до ввода в эксплуатацию должен храниться при температуре окружающего воздуха 5-40°C и относительной влажности воздуха до 80% при температуре +25°C.

Хранение ММС-1 без упаковки следует производить при температуре окружающего воздуха 10-35 °С и относительной влажности воздуха 80% при температуре +35°C.

В помещениях для хранения не должно быть пыли, паров, кислот, щелочей, вызывающих коррозию.

Нормальные условия окружающей среды

- на высотах до 2000 м;
- рабочая температура от 10° до 35°C
- температура хранения от -20°C до +60°C
- при максимальной относительной влажности 80 % для температур до 31°C и с линейным уменьшением относительной влажности до 50% при увеличении температуры до 40°C

Срок хранения в консервации и упаковке изготовителя 5 лет .

## 12 Транспортирование

### 12.1 Тара, упаковка

Для обеспечения сохранности магазина при транспортировании используется укладочная коробка.

Упаковывание магазина производится в следующей последовательности:

- корпус магазина поместить в полиэтиленовую упаковку, перевязать шпагатом и поместить в коробку;
- эксплуатационную документацию поместить в полиэтиленовый пакет и уложить на магазин или между боковой стенкой коробки и магазином;

- товаросопроводительную документацию в пакете поместить под крышку коробки;
- обтянуть коробку пластиковой лентой и опломбировать.

## 12.2 Условия транспортирования

Транспортирование магазина в укладочной коробке производится всеми видами транспорта на любые расстояния.

При транспортировании должна быть предусмотрена защита от попадания атмосферных осадков и пыли. Не допускается кантование.

## 13 ПРИЛОЖЕНИЯ

### 13.1 Сведения об изготовителе и поставщике

Поставщик прибора в Россию и СНГ, осуществляющим гарантийное и послегарантийное обслуживание:

ООО «СОНЭЛ», Россия

115583, Москва, Каширское шоссе, 65,

тел./факс +7(495) 287-43-53;

E-mail: [info@sonel.ru](mailto:info@sonel.ru); Internet: [www.sonel.ru](http://www.sonel.ru)

### 13.2 Сведения о сервисном центре

Гарантийный и послегарантийный ремонт прибора осуществляют авторизованные **Сервисные центры**. Обслуживанием Пользователей в России занимается Сервисный центр в г. Москва, расположенный по адресу:

115583, Москва, Каширское шоссе, 65,

тел./факс +7(495) 287-43-53;

E-mail: [info@sonel.ru](mailto:info@sonel.ru),

Internet: [www.sonel.ru](http://www.sonel.ru)

Чтобы узнать адреса Сервисных центров в других странах мира, обратитесь к Изготовителю.
